# Supplementary material
Source: publisher figshare collection journal article supplement (https://gsapubs.figshare.com/ndownloader/files/23297066)
Supplement: Supplementary file 1 [file 23297066]

**Table 12. Electron microprobe analyses and structural formulae of accessory minerals from plutonic and metamorphic rocks of the Peninsular Ranges batholith, San Diego County, California**

| Sample no. | Unit                   | Grain           | Comment <sup>1</sup>    | Mineral      | SiO <sub>2</sub> | TiO <sub>2</sub> | Al <sub>2</sub> O <sub>3</sub> | Cr <sub>2</sub> O <sub>3</sub> | Fe <sub>2</sub> O <sub>3</sub> | FeO   | MnO  | NiO  | MgO  | BaO  | CaO   | Na <sub>2</sub> O | K <sub>2</sub> O | F    | Cl   | Total  |
|------------|------------------------|-----------------|-------------------------|--------------|------------------|------------------|--------------------------------|--------------------------------|--------------------------------|-------|------|------|------|------|-------|-------------------|------------------|------|------|--------|
| VM932      | Chiquito Peak (Kcp)    | gr1             |                         | titanite     | 29.46            | 37.28            | 0.92                           | 0.00                           |                                | 1.17  | 0.16 | 0.00 | 0.00 | 0.00 | 27.88 | 0.03              | 0.00             | 0.24 | 0.00 | 97.13  |
| VM932      | Kcp                    | gr2             |                         | epidote      | 36.99            | 0.17             | 22.17                          | 0.07                           |                                | 13.42 | 0.21 | 0.05 | 0.00 | 0.00 | 23.42 | 0.02              | 0.01             | 0.05 | 0.00 | 96.57  |
| CP133      | Kcp                    | gr1             |                         | epidote      | 37.41            | 0.04             | 22.84                          | 0.03                           |                                | 12.54 | 0.36 | 0.05 | 0.00 | 0.00 | 23.67 | 0.00              | 0.00             | 0.00 | 0.00 | 96.94  |
| CP170B     | Amphibolite (Amphib.)  | gr1             | in JTrm                 | titanite     | 30.11            | 38.06            | 1.58                           | 0.09                           |                                | 0.31  | 0.06 | 0.05 | 0.00 | 0.00 | 28.57 | 0.00              | 0.01             | 0.30 | 0.00 | 99.14  |
| CP170B     | Amphib.                | gr2c            | "                       | "            | 30.23            | 38.01            | 1.65                           | 0.06                           |                                | 0.30  | 0.09 | 0.14 | 0.00 | 0.00 | 28.98 | 0.00              | 0.00             | 0.39 | 0.00 | 99.84  |
| CP170B     | Amphib.                | gr3c            | "                       | "            | 30.36            | 37.49            | 1.97                           | 0.06                           |                                | 0.22  | 0.03 | 0.07 | 0.00 | 0.00 | 28.45 | 0.01              | 0.03             | 0.32 | 0.00 | 99.01  |
| 1079A1     | Western metavolcanic   | gr1             | pelitic schist          | aluminosil.  | 37.34            |                  | 62.68                          |                                |                                | 0.54  |      |      |      |      |       |                   |                  |      |      | 100.57 |
| 1079A1     | rocks (Kmv)            | gr2             | "                       | "            | 36.83            |                  | 60.77                          |                                |                                | 0.66  |      |      |      |      |       |                   | 0.06             |      |      | 98.33  |
| 1079A1     | Kmv                    | fibrous mass    | "                       | fibrolite    | 39.26            |                  | 55.23                          |                                |                                |       |      |      | 0.15 |      |       | 0.11              | 2.87             |      |      | 97.62  |
| 1079A1     | Kmv                    | mixture         | "                       | aluminosil.  | 36.18            |                  | 55.80                          |                                |                                | 1.07  |      |      | 0.16 |      |       |                   | 0.18             |      |      | 93.39  |
| 1079C1     | Kmv                    | gr1c            | large aggregate         | titanite     | 30.44            | 36.68            | 1.82                           |                                |                                | 1.43  |      |      |      |      | 28.94 |                   |                  |      |      | 99.30  |
| 1079C1     | Kmv                    | gr1r            | "                       | "            | 31.66            | 34.92            | 3.69                           |                                |                                | 1.07  |      |      |      |      | 27.97 | 0.16              |                  |      |      | 99.47  |
| 1079C1     | Kmv                    | gr2             | "                       | "            | 30.46            | 36.55            | 1.49                           |                                |                                | 1.34  |      |      |      |      | 29.15 |                   |                  |      |      | 98.99  |
| 1079C1     | Kmv                    | gr3             | "                       | "            | 29.88            | 37.10            | 1.19                           |                                |                                | 1.46  | 0.06 |      |      |      | 28.92 |                   |                  |      |      | 98.62  |
| 1079C1     | Kmv                    | gr4             | small, mosaic           | grossularite | 38.01            | 0.22             | 11.78                          |                                |                                | 14.68 | 1.38 |      |      |      | 34.16 |                   |                  |      |      | 100.24 |
| 1079C1     | Kmv                    | gr5             | "                       | "            | 38.26            |                  | 12.18                          |                                |                                | 14.50 | 1.77 |      |      |      | 33.80 |                   |                  |      |      | 100.52 |
| 1079K      | Julian Schist (JTrm)   | gr1             |                         | titanite     | 29.17            | 37.75            | 1.27                           |                                |                                | 0.27  |      |      |      |      | 29.30 |                   |                  |      |      | 97.76  |
| 1079K      | JTrm                   | gr2             |                         | "            | 29.38            | 34.62            | 3.14                           | 0.09                           |                                | 0.34  |      |      | 0.06 |      | 29.27 |                   |                  |      |      | 96.91  |
| J914       | Harper Creek (Jhc)     | gr1             |                         | tourmaline   | 36.30            | 1.72             | 32.08                          | 0.00                           |                                | 7.45  | 0.10 | 0.00 | 6.51 | 0.00 | 1.50  | 1.57              | 0.08             | 0.18 | 0.00 | 87.48  |
| Jhc15      | Jhc                    | gr1c            |                         | cordierite   | 46.72            | 0.00             | 32.46                          | 0.00                           |                                | 8.75  | 0.51 | 0.00 | 7.61 |      | 0.00  | 0.33              | 0.00             | 0.00 | 0.00 | 96.37  |
| Jhc15      | Jhc                    | gr1r-1          |                         | "            | 49.43            | 0.00             | 33.57                          | 0.00                           |                                | 9.38  | 0.65 | 0.00 | 7.83 |      | 0.00  | 0.05              | 0.00             | 0.00 | 0.00 | 101.11 |
| Jhc15      | Jhc                    | gr1r-2          |                         | "            | 49.05            | 0.00             | 34.49                          | 0.00                           |                                | 9.41  | 0.40 | 0.00 | 7.96 |      | 0.00  | 0.41              | 0.00             | 0.06 | 0.01 | 101.76 |
| Jhc15      | Jhc                    | gr2             |                         | "            | 49.37            | 0.00             | 34.92                          | 0.00                           |                                | 9.62  | 0.42 | 0.00 | 8.24 |      | 0.00  | 0.41              | 0.00             | 0.00 | 0.00 | 102.98 |
| Jhc15      | Jhc                    | gr3c            |                         | "            | 48.34            | 0.00             | 34.40                          | 0.00                           |                                | 9.04  | 0.63 | 0.00 | 8.06 |      | 0.00  | 0.31              | 0.00             | 0.00 | 0.00 | 100.77 |
| Jhc15      | Jhc                    | gr3r            |                         | "            | 47.05            | 0.00             | 34.07                          | 0.00                           |                                | 8.73  | 0.60 | 0.00 | 7.69 |      | 0.00  | 0.26              | 0.00             | 0.00 | 0.00 | 98.42  |
| CP106      | Jhc                    | gr1             |                         | tourmaline   | 35.30            | 1.50             | 29.70                          |                                |                                | 7.20  |      |      | 6.80 |      | 1.10  | 2.00              |                  |      |      | 83.60  |
| W2         | La Posta (Klp)         | gr1             |                         | titanite     | 28.96            | 37.22            | 1.57                           |                                |                                | 0.51  | 0.10 |      |      |      | 27.69 |                   |                  |      |      | 96.08  |
| W4         | Klp                    | gr1             |                         | titanite     | 30.88            | 34.85            | 3.69                           |                                |                                | 1.47  |      |      | 0.21 |      | 28.51 |                   |                  |      |      | 99.79  |
| 86CA036    | Alpine (Ka)            | gr1             |                         | epidote      | 35.97            | 0.62             | 24.77                          |                                | 11.74                          |       | 0.26 |      | 0.07 |      | 23.73 |                   |                  |      |      | 97.16  |
| 86CA006    | Granite Mountain (Kgm) | gr1 (avg. of 2) | in hbl                  | epidote      | 37.66            | 0.24             | 24.19                          |                                | 12.62                          |       | 0.40 |      | 0.08 |      | 23.55 |                   |                  |      |      | 98.74  |
| 86CA043    | Kgm                    | gr1-1           | c/ilmenite <sup>2</sup> | "            | 37.91            | 0.10             | 24.18                          |                                | 13.42                          |       | 0.23 |      | 0.06 |      | 23.10 |                   |                  |      |      | 99.00  |
| 86CA043    | Kgm                    | gr1-2           | r/hbl                   | "            | 37.40            |                  | 25.43                          |                                | 11.39                          |       | 0.34 |      | 0.03 |      | 23.39 |                   |                  |      |      | 97.98  |
| 86CA043    | Kgm                    | gr1-3           | in hbl                  | "            | 37.10            | 0.04             | 24.01                          |                                | 13.41                          |       | 0.26 |      | 0.04 |      | 24.47 |                   |                  |      |      | 99.33  |
| 86CA043    | Kgm                    | gr1-4           | "                       | "            | 37.64            | 0.21             | 24.95                          |                                | 11.91                          |       | 0.31 |      | 0.08 |      | 24.54 |                   |                  |      |      | 99.64  |
| 86CA045    | Kgm                    | gr1             | r/hbl                   | "            | 37.65            | 0.18             | 23.01                          |                                | 14.32                          |       | 0.20 |      | 0.01 |      | 23.35 |                   |                  |      |      | 98.72  |

1. Blank space indicates element/oxide not determined, not present, or below limit of detection  
2. c/ilmenite= point in core, accessory against ilmenite; r/hbl= point in rim, accessory against hbl

| Oxygens | Si   | Ti   | Al   | Cr   | Fe <sup>3+</sup> | Fe <sup>2+</sup> | Mn   | Ni   | Mg   | Ca   | Na   | K    | F    | Cl   | Total |
|---------|------|------|------|------|------------------|------------------|------|------|------|------|------|------|------|------|-------|
|         |      |      |      |      |                  |                  |      |      |      |      |      |      |      |      |       |
| 23      | 4.62 |      | 9.14 |      |                  | 0.06             |      |      |      |      |      |      |      |      | 13.81 |
| 23      |      |      |      |      |                  |                  |      |      |      |      |      |      |      |      |       |
| 23      | 5.06 |      | 8.40 |      |                  |                  |      |      | 0.03 |      | 0.03 | 0.47 |      |      | 13.99 |
| 23      | 4.83 |      | 8.78 |      |                  | 0.06             |      |      | 0.03 |      |      | 0.03 |      |      | 13.79 |
| 22      | 4.42 | 4.01 | 0.31 |      |                  | 0.17             |      |      |      | 4.50 |      |      |      |      | 13.42 |
| 22      | 4.54 | 3.77 | 0.62 |      |                  | 0.13             |      |      |      | 4.30 | 0.05 |      |      |      | 13.40 |
| 22      | 4.44 | 4.01 | 0.26 |      |                  | 0.16             |      |      |      | 4.55 |      |      |      |      | 13.42 |
| 22      | 4.38 | 4.09 | 0.21 |      |                  | 0.18             | 0.01 |      |      | 4.55 |      |      |      |      | 13.42 |
| 22      | 5.68 | 0.03 | 2.07 |      |                  | 1.83             | 0.17 |      |      | 5.47 |      |      |      |      | 15.26 |
| 12      | 3.10 |      | 1.16 |      |                  | 0.98             | 0.12 |      |      | 2.94 |      |      |      |      | 8.31  |
| 23      | 4.50 | 4.38 | 0.23 |      |                  | 0.04             |      |      |      | 4.85 |      |      |      |      | 14.00 |
| 23      | 4.56 | 4.04 | 0.57 | 0.01 |                  | 0.04             |      |      | 0.01 | 4.87 |      |      |      |      | 14.11 |
|         |      |      |      |      |                  |                  |      |      |      |      |      |      |      |      |       |
| 18      | 4.94 | 0.00 | 4.04 | 0.00 |                  | 0.77             | 0.05 | 0.00 | 1.20 | 0.00 | 0.07 | 0.00 | 0.00 | 0.00 | 11.07 |
| 18      | 4.98 | 0.00 | 3.99 | 0.00 |                  | 0.79             | 0.06 | 0.00 | 1.18 | 0.00 | 0.05 | 0.00 | 0.00 | 0.00 | 11.04 |
| 18      | 4.92 | 0.00 | 4.07 | 0.00 |                  | 0.79             | 0.03 | 0.00 | 1.19 | 0.00 | 0.08 | 0.00 | 0.02 | 0.00 | 11.10 |
| 18      | 4.90 | 0.00 | 4.08 | 0.00 |                  | 0.80             | 0.04 | 0.00 | 1.22 | 0.00 | 0.08 | 0.00 | 0.00 | 0.00 | 11.10 |
| 18      | 4.89 | 0.00 | 4.10 | 0.00 |                  | 0.76             | 0.05 | 0.00 | 1.22 | 0.00 | 0.06 | 0.00 | 0.00 | 0.00 | 11.08 |
| 18      | 4.87 | 0.00 | 4.15 | 0.00 |                  | 0.76             | 0.05 | 0.00 | 1.19 | 0.00 | 0.05 | 0.00 | 0.00 | 0.00 | 11.07 |
|         |      |      |      |      |                  |                  |      |      |      |      |      |      |      |      |       |
| 2       | 2.89 | 0.04 | 2.34 |      | 0.71             |                  | 0.02 |      | 0.01 | 2.04 |      |      |      |      | 8.05  |
| 2       | 2.97 | 0.01 | 2.25 |      | 0.75             |                  | 0.03 |      | 0.01 | 1.99 |      |      |      |      | 8.01  |
| 2       | 2.98 | 0.01 | 2.24 |      | 0.79             |                  | 0.02 |      | 0.01 | 1.95 |      |      |      |      | 7.99  |
| 2       | 2.96 |      | 2.37 |      | 0.68             |                  | 0.02 |      | 0.00 | 1.98 |      |      |      |      | 8.02  |
| 2       | 2.93 | 0.00 | 2.23 |      | 0.80             |                  | 0.02 |      | 0.00 | 2.07 |      |      |      |      | 8.05  |
| 2       | 2.94 | 0.01 | 2.30 |      | 0.70             |                  | 0.02 |      | 0.01 | 2.06 |      |      |      |      | 8.04  |
| 2       | 2.99 | 0.01 | 2.15 |      | 0.85             |                  | 0.01 |      | 0.00 | 1.98 |      |      |      |      | 8.00  |
