# Supplementary material
Source: publisher figshare collection journal article supplement (https://gsapubs.figshare.com/ndownloader/files/23297066)
Supplement: Supplementary file 2 [file 23297066]

| Table 7. Electron microprobe analyses and structural formulae of muscovite from plutonic and metamorphic rocks of the Peninsular Ranges batholith, San Diego County, California |                                     |                    |            |                  |                  |                                |                                |      |      |      |      |      |                   |                  |       |      |       |       |      |      |      |       |      |       |      |       |      |      |      |       |       |
|---------------------------------------------------------------------------------------------------------------------------------------------------------------------------------|-------------------------------------|--------------------|------------|------------------|------------------|--------------------------------|--------------------------------|------|------|------|------|------|-------------------|------------------|-------|------|-------|-------|------|------|------|-------|------|-------|------|-------|------|------|------|-------|-------|
| Sample                                                                                                                                                                          | Unit/<br>Suite                      | Grain <sup>1</sup> | Comment    | SiO <sub>2</sub> | TiO <sub>2</sub> | Al <sub>2</sub> O <sub>3</sub> | Cr <sub>2</sub> O <sub>3</sub> | FeO  | MnO  | MgO  | CaO  | BaO  | Na <sub>2</sub> O | K <sub>2</sub> O | F     | Cl   | Total | Oxs   | Si   | Ti   | Al   | Cr    | Fe   | Mn    | Mg   | Ca    | Na   | K    | F    | Cl    | Total |
| No.                                                                                                                                                                             |                                     |                    |            |                  |                  |                                |                                |      |      |      |      |      |                   |                  |       |      |       |       |      |      |      |       |      |       |      |       |      |      |      |       |       |
| MP6                                                                                                                                                                             | Harper Creek (Jhc)                  | ms1c               |            | 45.23            | 1.07             | 34.51                          |                                | 1.00 |      | 0.83 |      |      | 0.56              | 10.07            |       |      | 93.27 | 22    | 6.14 | 0.11 | 5.52 | 0.00  | 0.11 | 0.00  | 0.17 | 0.00  | 0.15 | 1.74 | 0.00 | 0.00  | 13.94 |
| MP6                                                                                                                                                                             | Jhc                                 | ms1r               |            | 45.21            | 1.10             | 34.67                          |                                | 1.09 |      | 0.85 |      |      | 0.59              | 10.01            |       |      | 93.52 | 22    | 6.12 | 0.11 | 5.53 | 0.00  | 0.12 | 0.00  | 0.17 | 0.00  | 0.16 | 1.73 | 0.00 | 0.00  | 13.94 |
| MP6                                                                                                                                                                             | Jhc                                 | ms2c               |            | 46.14            | 0.98             | 34.83                          |                                | 1.01 |      | 0.86 |      |      | 0.59              | 10.01            |       |      | 94.41 | 22    | 6.17 | 0.10 | 5.49 | 0.00  | 0.11 | 0.00  | 0.17 | 0.00  | 0.15 | 1.71 | 0.00 | 0.00  | 13.91 |
| MP6                                                                                                                                                                             | Jhc                                 | ms2r               |            | 46.15            | 1.02             | 35.02                          |                                | 1.05 |      | 0.81 |      |      | 0.66              | 9.90             |       |      | 94.61 | 22    | 6.16 | 0.10 | 5.51 | 0.00  | 0.12 | 0.00  | 0.16 | 0.00  | 0.17 | 1.69 | 0.00 | 0.00  | 13.91 |
| MP6                                                                                                                                                                             | Jhc                                 | ms3c               |            | 44.63            | 1.18             | 34.43                          |                                | 0.98 | 0.07 | 0.81 |      |      | 0.54              | 10.05            |       |      | 92.70 | 6     | 1.66 | 0.03 | 1.51 |       | 0.03 |       | 0.05 |       | 0.04 | 0.48 |      |       | 3.80  |
| MP6                                                                                                                                                                             | Jhc                                 | ms3r               |            | 43.83            | 1.12             | 34.28                          |                                | 1.17 |      | 0.83 |      |      | 0.46              | 9.79             |       |      | 91.49 | 6     | 1.66 | 0.03 | 1.53 |       | 0.04 |       | 0.05 |       | 0.03 | 0.47 |      |       | 3.80  |
| J40                                                                                                                                                                             | Jhc                                 | ms1r-1             |            | 45.23            | 1.04             | 35.06                          |                                | 0.92 |      | 0.85 |      |      | 0.40              | 10.40            |       |      | 93.90 | 22    | 6.10 | 0.11 | 5.58 | 0.00  | 0.10 | 0.00  | 0.17 | 0.00  | 0.11 | 1.79 | 0.00 | 0.00  | 13.95 |
| J40                                                                                                                                                                             | Jhc                                 | ms1r-2             |            | 46.38            | 1.04             | 35.26                          |                                | 0.84 |      | 0.87 |      |      | 0.38              | 10.47            |       |      | 95.24 | 22    | 6.16 | 0.10 | 5.52 | 0.00  | 0.09 | 0.00  | 0.17 | 0.00  | 0.10 | 1.77 | 0.00 | 0.00  | 13.92 |
| J40                                                                                                                                                                             | Jhc                                 | ms1c               |            | 44.68            | 1.41             | 34.66                          |                                | 1.01 |      | 1.03 |      |      | 0.37              | 10.61            |       |      | 93.76 | 22    | 6.06 | 0.14 | 5.54 | 0.00  | 0.12 | 0.00  | 0.21 | 0.00  | 0.10 | 1.84 | 0.00 | 0.00  | 14.00 |
| J40                                                                                                                                                                             | Jhc                                 | ms2r-1             |            | 44.76            | 1.18             | 34.09                          |                                | 0.94 |      | 1.03 | 0.08 |      | 0.37              | 9.68             |       |      | 92.15 | 22    | 6.14 | 0.12 | 5.51 | 0.00  | 0.11 | 0.00  | 0.21 | 0.01  | 0.10 | 1.69 | 0.00 | 0.00  | 13.89 |
| J40                                                                                                                                                                             | Jhc                                 | ms2r-2             |            | 42.54            | 1.21             | 33.08                          |                                | 0.80 |      | 0.87 | 0.14 |      | 0.36              | 9.77             |       |      | 88.76 | 22    | 6.07 | 0.13 | 5.57 | 0.00  | 0.10 | 0.00  | 0.19 | 0.02  | 0.10 | 1.78 | 0.00 | 0.00  | 13.95 |
| J40                                                                                                                                                                             | Jhc                                 | ms2c               |            | 45.22            | 1.31             | 34.84                          |                                | 0.92 |      | 0.98 | 0.05 |      | 0.46              | 10.23            |       |      | 94.01 | 22    | 6.09 | 0.13 | 5.53 | 0.00  | 0.10 | 0.00  | 0.20 | 0.01  | 0.12 | 1.76 | 0.00 | 0.00  | 13.95 |
| J40                                                                                                                                                                             | Jhc                                 | ms3                |            | 46.13            | 1.07             | 35.87                          |                                | 1.03 |      | 0.92 |      |      | 0.50              | 10.42            |       |      | 95.94 | 22    | 6.09 | 0.11 | 5.58 | 0.00  | 0.11 | 0.00  | 0.18 | 0.00  | 0.13 | 1.76 | 0.00 | 0.00  | 13.96 |
| CP66                                                                                                                                                                            | Jhc                                 | ms1                |            | 45.95            | 1.30             | 35.08                          | 0.04                           | 0.85 | 0.03 | 0.59 | 0.01 | 0.08 | 0.84              | 10.16            | 0.07  | 0.01 | 94.98 | 22    | 6.13 | 0.13 | 5.51 | 0.004 | 0.10 | 0.003 | 0.12 | 0.001 | 0.23 | 1.73 | 0.03 | 0.002 | 13.97 |
| CP66                                                                                                                                                                            | Jhc                                 | ms3                |            | 45.35            | 1.43             | 35.55                          | 0.01                           | 0.82 | 0.04 | 0.52 |      | 0.05 | 0.86              | 10.21            | 0.03  | 0.01 | 94.88 | 22    | 6.06 | 0.14 | 5.60 | 0.001 | 0.09 | 0.005 | 0.10 | 0.00  | 0.22 | 1.74 | 0.01 | 0.002 | 13.98 |
| 1079A1 <sup>2</sup>                                                                                                                                                             | Western metavolcanic<br>rocks (Kmv) | ms1c               | Large shee | 45.95            | 0.59             | 35.02                          |                                | 1.83 |      | 0.69 |      |      | 0.62              | 10.02            |       |      | 94.72 | 22    | 6.16 | 0.06 | 5.53 | 0.00  | 0.21 | 0.00  | 0.14 | 0.00  | 0.16 | 1.71 | 0.00 | 0.00  | 13.96 |
| 1079A1                                                                                                                                                                          |                                     | ms1r               | "          | 45.70            | 0.57             | 34.97                          |                                | 1.68 |      | 0.63 |      |      | 0.62              | 10.28            |       |      | 94.45 | 22    | 6.15 | 0.06 | 5.54 | 0.00  | 0.19 | 0.00  | 0.13 | 0.00  | 0.16 | 1.76 | 0.00 | 0.00  | 13.99 |
| 1079A1                                                                                                                                                                          |                                     | Kmv                | ms2c       | Small lath       | 46.44            | 0.22                           | 35.35                          |      | 1.91 |      | 0.76 |      |                   | 0.60             | 10.49 |      |       | 95.78 | 22   | 6.17 | 0.02 | 5.53  | 0.00 | 0.21  | 0.00 | 0.15  | 0.00 | 0.16 | 1.78 | 0.00  | 0.00  |
| 1079A1                                                                                                                                                                          | Kmv                                 | ms2r               | "          | 45.50            | 0.36             | 34.89                          |                                | 1.94 |      | 0.69 |      |      | 0.60              | 10.27            |       |      | 94.25 | 22    | 6.14 | 0.04 | 5.55 | 0.00  | 0.22 | 0.00  | 0.14 | 0.00  | 0.16 | 1.77 | 0.00 | 0.00  | 14.01 |
| 1079J <sup>2</sup>                                                                                                                                                              | Julian Schist (JTrm)                | ms1                |            | 46.31            | 0.67             | 33.68                          |                                | 1.49 |      | 1.05 |      |      | 0.32              | 10.74            |       |      | 94.25 | 22    | 6.25 | 0.07 | 5.35 | 0.00  | 0.17 | 0.00  | 0.21 | 0.00  | 0.08 | 1.85 | 0.00 | 0.00  | 13.98 |
| 1079J                                                                                                                                                                           | JTrm                                | ms2                |            | 46.91            | 0.92             | 34.61                          |                                | 1.34 |      | 0.86 |      |      | 0.36              | 10.64            |       |      | 95.63 | 22    | 6.22 | 0.09 | 5.41 | 0.00  | 0.15 | 0.00  | 0.17 | 0.00  | 0.09 | 1.80 | 0.00 | 0.00  | 13.93 |
| 1079L1 <sup>2</sup>                                                                                                                                                             | JTrm                                | ms1                |            | 46.79            | 0.39             | 36.12                          |                                | 0.86 |      | 0.73 |      |      | 0.40              | 10.21            |       |      | 95.50 | 22    | 6.17 | 0.04 | 5.62 | 0.00  | 0.10 | 0.00  | 0.14 | 0.00  | 0.10 | 1.72 | 0.00 | 0.00  | 13.89 |
| 1079L1                                                                                                                                                                          | JTrm                                | ms2                |            | 46.85            | 0.70             | 35.70                          |                                | 1.00 |      | 0.70 |      |      | 0.34              | 10.24            |       |      | 95.53 | 22    | 6.19 | 0.07 | 5.56 | 0.00  | 0.11 | 0.00  | 0.14 | 0.00  | 0.09 | 1.73 | 0.00 | 0.00  | 13.87 |
| 1. Muscovite = ms; ms1c, first grain, point in core; ms1r, first grain, point in rim; ms2r-1, grain 2, first point in rim; ms2r-2, grain 2, second point in rim                 |                                     |                    |            |                  |                  |                                |                                |      |      |      |      |      |                   |                  |       |      |       |       |      |      |      |       |      |       |      |       |      |      |      |       |       |
| 2. 1079A1 and 1079J are pelitic schist; 1079L1 is semi-pelitic schist                                                                                                           |                                     |                    |            |                  |                  |                                |                                |      |      |      |      |      |                   |                  |       |      |       |       |      |      |      |       |      |       |      |       |      |      |      |       |       |
| 3. Blank space indicates element/oxide not determined, not present, or below detection limit                                                                                    |                                     |                    |            |                  |                  |                                |                                |      |      |      |      |      |                   |                  |       |      |       |       |      |      |      |       |      |       |      |       |      |      |      |       |       |
|                                                                                                                                                                                 |                                     |                    |            |                  |                  |                                |                                |      |      |      |      |      |                   |                  |       |      |       |       |      |      |      |       |      |       |      |       |      |      |      |       |       |
