# Supplementary material
Source: publisher figshare collection journal article supplement (https://gsapubs.figshare.com/ndownloader/files/23297066)
Supplement: Supplementary file 3 [file 23297066]

| Table 2. Samples analyzed by electron microprobe, Peninsular Ranges batholith, San Diego County, California |                                         |                         |                          |                        |                         |                        |                                                                  |
|-------------------------------------------------------------------------------------------------------------|-----------------------------------------|-------------------------|--------------------------|------------------------|-------------------------|------------------------|------------------------------------------------------------------|
| Sample No.                                                                                                  | Suite/unit <sup>2</sup><br>(map symbol) | 30' x 60'<br>quadrangle | 7.5-minute<br>quadrangle | Latitude (°N)<br>° ' " | Longitude (°W)<br>° ' " | Lithology <sup>1</sup> | Remarks                                                          |
| 86CA001 <sup>3</sup>                                                                                        | Granite Mountain (Kgm)                  | El Cajon                | Alpine                   | 32 48 12               | 116 49 10               | granodiorite           | subidiomorphic texture                                           |
| 86CA006                                                                                                     | "                                       | "                       | "                        | 32 45 23               | 116 46 13               | tonalite               | "                                                                |
| 86CA023                                                                                                     | "                                       | Borrego Valley          | Earthquake Valley        | 32 36 44               | 116 30 03               | tonalite               | moderate subsolidus recrystallization                            |
| 86CA026                                                                                                     | "                                       | El Cajon                | Agua Caliente Springs    | 32 57 13               | 116 18 10               | tonalite               | strong subsolidus recrystallization                              |
| 86CA043                                                                                                     | Khsm <sup>4</sup>                       | Borrego Valley          | Hot Springs Mountain     | 33 16 11               | 116 36 58               | tonalite               | Kgm/Klp (eastern)-type                                           |
| 86CA045                                                                                                     | Khsm                                    | "                       | "                        | 33 16 24               | 116 37 19               | granodiorite           | "                                                                |
| EV3                                                                                                         | Granite Mountain (Kgm)                  | "                       | Earthquake Valley        | 33 02 20               | 116 24 32               | tonalite               |                                                                  |
| J32A                                                                                                        | "                                       | "                       | Ranchita                 | 33 07 35               | 116 36 01               | quartz diorite         |                                                                  |
| ML42                                                                                                        | "                                       | El Cajon                | Cameron Corners          | 32 43 47               | 116 28 41               | tonalite               |                                                                  |
| SS832                                                                                                       | "                                       | "                       | Campo                    | 32 36 28               | 116 28 25               | granodiorite           |                                                                  |
| 86CA048                                                                                                     | "                                       | Borrego Valley          | Beauty Mountain          | 33 22 41               | 116 42 24               | tonalite               | Kgm/Klp (eastern)-type                                           |
| MP8A                                                                                                        | "                                       | El Cajon                | Monument Peak            | 32 59 01               | 116 24 26               | leucotonalite          | pegmatite                                                        |
| A47                                                                                                         | "                                       | "                       | Alpine                   | 32 48 09               | 116 49 13               | tonalite               |                                                                  |
| SY921                                                                                                       | "                                       | Borrego Valley          | Santa Ysabel             | 33 06 26               | 116 39 24               | tonalite               |                                                                  |
| W6                                                                                                          | "                                       | El Cajon                | In-ko-pah Gorge          | 32 42 22               | 116 03 09               | tonalite               | hornblende-rich phase in Klp pluton                              |
| 86CA009                                                                                                     | La Posta (Klp)                          | El Cajon                | Cameron Corners          | 32 43 23               | 116 26 35               | granodiorite/tonalite  | La Posta type locality (Miller, 1935)                            |
| 86CA031                                                                                                     | "                                       | "                       | In-ko-pah Gorge          | 32 41 53               | 116 03 41               | "                      | Kgm/Klp (eastern)-type                                           |
| W1                                                                                                          | "                                       | "                       | Jacumba                  | 32 38 02               | 116 08 47               | granodiorite           |                                                                  |
| W2                                                                                                          | "                                       | "                       | In-ko-pah Gorge          | 32 39 37               | 116 05 38               | tonalite               |                                                                  |
| W3                                                                                                          | "                                       | "                       | Live Oak Springs         | 32 40 28               | 116 16 52               | granodiorite           |                                                                  |
| W4                                                                                                          | "                                       | "                       | Cameron Corners          | 32 42 45               | 116 22 50               | "                      |                                                                  |
| WSP16                                                                                                       | "                                       | "                       | Sweeney Pass             | 32 52 08               | 116 13 50               | tonalite               |                                                                  |
| TS43A                                                                                                       | Cuyamaca Gabbro (Kc)                    | El Cajon                | Tule Springs             | 32 55 34               | 116 37 53               | hornblende gabbro      | Kc mingling with tonalite (Ka) along contact; A= basaltic blobs, |
| TS43B                                                                                                       | "                                       | "                       | "                        | 32 55 34               | 116 37 53               | diorite/quartz diorite | B= contaminated granitic matrix of A                             |
| TS92B                                                                                                       | "                                       | "                       | "                        | 32 54 59               | 116 39 23               | hornblende gabbro      | Kc mingling with Kcp tonalite; fine-grained gabbroic schlieren   |
| VM40                                                                                                        | "                                       | "                       | Viejas Mountain          | 32 45 02               | 116 40 19               | "                      | small gabbro body                                                |
| TS93                                                                                                        | "                                       | "                       | Tule Springs             | 32 53 25               | 116 38 57               | opx-bt-hbl diorite     | "                                                                |
| TS57                                                                                                        | "                                       | "                       | "                        | 32 55 33               | 116 39 34               | hornblende gabbro      | small gabbro body in Tule Springs plutonic complex               |
| D59                                                                                                         | "                                       | "                       | Descanso                 | 32 49 26               | 116 30 14               | "                      | Sunrise Highway gabbro pluton                                    |
| A76                                                                                                         | "                                       | "                       | Alpine                   | 32 48 55               | 116 51 45               | hbl-px diorite         | fine-grained gabbro in metavolcanic screen in Kvj                |
| VM75X                                                                                                       | Mafic enclave                           | El Cajon                | Viejas Mountain          | 32 50 06               | 116 44 59               | diorite                | mafic enclave in VM75 (Ka)                                       |
| VM41                                                                                                        | Mafic/intermediate dikes (Kmid)         | "                       | "                        | 32 50 16               | 116 39 35               | tonalite               | fine-grained mafic dike in Kcp                                   |
| VM76A                                                                                                       | "                                       | "                       | "                        | 32 51 29               | 116 40 59               | "                      | dark-gray, fine to medium-grained porphyritic dike in Kvj        |
| W5                                                                                                          | "                                       | "                       | Cameron Corners          | 32 43 21               | 116 28 28               | "                      | mafic rock in Kgm (mingling)                                     |
| VM76C                                                                                                       | "                                       | "                       | Viejas Mountain          | 32 51 29               | 116 40 59               | "                      | fine-grained mafic dike in Kvj, small phenocrysts                |
| D52                                                                                                         | "                                       | "                       | Descanso                 | 32 50 29               | 116 36 33               | bt-hbl basaltic dike   | very fine-grained mafic dike in Kcm; undeformed                  |
| D103B                                                                                                       | "                                       | "                       | "                        | 32 49 10               | 116 32 34               | bt-hbl gabbro          | plagioclase-phyric chilled mafic dike in Jcr                     |
| W1A                                                                                                         | "                                       | "                       | Jacumba                  | 32 38 02               | 116 08 47               | tonalite               | fine-grained mafic rock in Klp (mingling)                        |
| A1                                                                                                          | Alpine (Ka)                             | El Cajon                | Alpine                   | 32 50 19               | 116 46 49               | tonalite/granodiorite  |                                                                  |
| A98                                                                                                         | "                                       | "                       | "                        | 32 52 14               | 116 51 05               | tonalite               | transitional to Klb (interfingering contact)                     |
| A99                                                                                                         | "                                       | "                       | El Cajon Mountain        | 32 52 33               | 116 49 11               | tonalite               | "                                                                |
| 41252                                                                                                       | "                                       | "                       | "                        | 32 57 03               | 116 45 33               | tonalite               |                                                                  |
| 86CA036                                                                                                     | "                                       | "                       | Alpine                   | 32 50 23               | 116 46 01               | "                      |                                                                  |
| TS37                                                                                                        | "                                       | "                       | Tule Springs             | 32 54 16               | 116 38 42               | "                      |                                                                  |
| TS65                                                                                                        | "                                       | "                       | "                        | 32 57 03               | 116 38 17               | quartz diorite         | mingling with small gabbro bodies                                |
| VM75                                                                                                        | "                                       | "                       | Viejas Mountain          | 32 50 06               | 116 44 59               | tonalite               | contains swarms of mafic enclaves                                |
| VM77                                                                                                        | Corte Madera (Kcm)                      | El Cajon                | Viejas Mountain          | 32 47 25               | 116 39 38               | syenogranite           | Japatul Valley plutonic complex                                  |
| D6216                                                                                                       | "                                       | "                       | Descanso                 | 32 50 29               | 116 36 33               | monzogranite           | strong subsolidus recrystallization                              |
| 86CA005                                                                                                     | "                                       | "                       | Alpine                   | 32 45 14               | 116 46 26               | granodiorite           | more mafic than average Kcm because of incorporated gabbro       |
| D94                                                                                                         | "                                       | "                       | Descanso                 | 32 45 44               | 116 36 47               | "                      | strong subsolidus recrystallization                              |
| VM69                                                                                                        | Chiquito Peak (Kcp)                     | El Cajon                | Viejas Mountain          | 32 50 16               | 116 39 35               | granodiorite           | Chiquito Peak pluton; gneissic                                   |
| VM25                                                                                                        | "                                       | "                       | "                        | 32 51 32               | 116 40 52               | tonalite/granodiorite  | dike in Kvj                                                      |

|            |                          |                |                       |          |           |                           |                                                   |
|------------|--------------------------|----------------|-----------------------|----------|-----------|---------------------------|---------------------------------------------------|
| VM932      | "                        | "              | "                     | 32 52 11 | 116 44 42 | leucotonalite             | fine-grained dike                                 |
| 86CA013    | "                        | "              | Cuyamaca Peak         | 32 54 31 | 116 34 32 | monzogranite              |                                                   |
| CC7B       | "                        | "              | Cameron Corners       | 32 43 10 | 116 29 50 | tonalite                  | protomylonite; abundant mafic/gabbroic enclaves   |
| CP128      | "                        | "              | Cuyamaca Peak         | 32 58 26 | 116 34 17 | monzogranite              | white euhedral K-feldspar megacrysts              |
| CP133      | "                        | "              | Descanso              | 32 51 40 | 116 35 21 | tonalite/granodiorite     | abundant mafic enclaves                           |
| CP925      | "                        | "              | Cuyamaca Peak         | 32 55 59 | 116 34 29 | monzogranite              | Cuyamaca Peak plutonic complex                    |
| SPL3       | "                        | Borrego Valley | San Pasqual           | 33 00 13 | 116 57 25 | monzogranite/granodiorite | Woodson Mountain pluton                           |
| 86CA037    | "                        | "              | "                     | 33 00 22 | 116 58 00 | leucomonzogranite         | "                                                 |
| SVR1       | "                        | El Cajon       | San Vicente Reservoir | 32 55 10 | 116 52 58 | monzogranite              | Barona Valley pluton                              |
| VM5        | "                        | "              | Viejas Mountain       | 32 50 29 | 116 39 13 | "                         | Chiquito Peak pluton                              |
| TS11B      | "                        | "              | Viejas Mountain       | 32 50 29 | 116 39 13 | "                         | "                                                 |
| CP50       | "                        | "              | Cuyamaca Peak         | 32 53 55 | 116 33 20 | "                         |                                                   |
| SS831      | "                        | "              | San Vicente Reservoir | 32 55 12 | 116 52 52 | "                         | Barona Valley pluton                              |
| VM68       | "                        | "              | Viejas Mountain       | 32 50 16 | 116 39 35 | granodiorite              | Chiquito Peak pluton; contaminated by mafic dikes |
| TS23A      | East Mesa (KJem)         | El Cajon       | Cuyamaca Peak         | 32 54 53 | 116 36 52 | quartz diorite            |                                                   |
| 86CA015    | "                        | "              | "                     | 32 54 44 | 116 33 06 | tonalite                  |                                                   |
| CP117A     | "                        | "              | "                     | 32 54 30 | 116 30 34 | quartz diorite            |                                                   |
| CP49       | Japatul Valley (Kjv)     | El Cajon       | Cuyamaca Peak         | 32 53 55 | 116 33 20 | tonalite                  |                                                   |
| EC1        | "                        | "              | El Cajon              | 32 48 41 | 116 52 32 | tonalite/granodiorite     |                                                   |
| VM511      | "                        | "              | Viejas Mountain       | 32 45 25 | 116 39 40 | tonalite/granodiorite     |                                                   |
| 86CA003    | "                        | "              | Alpine                | 32 48 22 | 116 48 23 | tonalite                  |                                                   |
| 86CA004    | "                        | "              | Viejas Mountain       | 32 46 14 | 116 41 52 | "                         |                                                   |
| TS17       | "                        | "              | Tule Springs          | 32 57 20 | 116 39 32 | "                         |                                                   |
| VM39       | "                        | "              | Viejas Mountain       | 32 46 19 | 116 40 16 | "                         |                                                   |
| WD100      | "                        | "              | Descanso              | 32 45 45 | 116 36 46 | "                         | strong subsolidus recrystallization               |
| ML12       | Las Bancas (Klb)         | El Cajon       | Mount Laguna          | 32 47 32 | 116 23 35 | granodiorite              | Mount Laguna pluton                               |
| ML13       | "                        | "              | "                     | 32 48 43 | 116 24 12 | tonalite                  | "                                                 |
| ML26       | "                        | "              | "                     | 32 51 15 | 116 26 10 | quartz monzodiorite       | "                                                 |
| VM6        | "                        | "              | Viejas Mountain       | 32 50 22 | 116 39 13 | granodiorite              | Las Bancas pluton                                 |
| VM89       | "                        | "              | "                     | 32 49 02 | 116 44 12 | granodiorite              | dike in Alpine pluton (Ka)                        |
| ML29       | "                        | "              | Mount Laguna          | 32 45 48 | 116 28 06 | tonalite                  | Mount Laguna pluton                               |
| A293       | "                        | "              | Alpine                | 32 49 13 | 116 46 34 | "                         |                                                   |
| A61        | "                        | "              | "                     | 32 49 31 | 116 47 34 | quartz diorite            |                                                   |
| A931       | "                        | "              | Viejas Mountain       | 32 48 02 | 116 44 53 | tonalite                  |                                                   |
| D28D       | "                        | "              | Descanso              | 32 49 22 | 116 35 43 | "                         | Las Bancas pluton                                 |
| ECM1       | "                        | "              | El Cajon Mountain     | 32 52 57 | 116 48 43 | "                         |                                                   |
| ML3        | "                        | "              | Mount Laguna          | 32 51 21 | 116 28 06 | "                         | Mount Laguna pluton                               |
| VM933      | "                        | "              | Viejas Mountain       | 32 49 19 | 116 37 39 | granodiorite              | Las Bancas pluton                                 |
| CP25       | Pine Valley (Kpv)        | El Cajon       | Cuyamaca Peak         | 32 55 48 | 116 36 15 | monzogranite              |                                                   |
| D58        | "                        | "              | Descanso              | 32 49 02 | 116 31 01 | monzogranite              | Pine Valley pluton                                |
| WD80A      | "                        | "              | "                     | 32 50 10 | 116 32 09 | granodiorite              | "                                                 |
| CP117B     | "                        | "              | Cuyamaca Peak         | 32 54 30 | 116 30 34 | pegmatite                 |                                                   |
| 86CA046    | Cuyamaca Reservoir (Jcr) | Borrego Valley | Hot Springs Mountain  | 33 22 29 | 116 37 16 | tonalite                  | Chihuahua Valley pluton                           |
| 86CA007    | "                        | El Cajon       | Descanso              | 32 49 22 | 116 33 19 | pyroxene granodiorite     |                                                   |
| CP153      | "                        | Borrego Valley | Julian                | 33 00 22 | 116 33 20 | quartz monzodiorite       | Cuyamaca Reservoir pluton                         |
| D29        | "                        | El Cajon       | Descanso              | 32 48 03 | 116 33 13 | tonalite                  |                                                   |
| D50 (=ML4) | "                        | "              | "                     | 32 50 57 | 116 29 23 | tonalite                  |                                                   |
| BH1        | "                        | Borrego Valley | Boucher Hill          | 33 17 11 | 116 52 52 | tonalite                  | hornblende-bearing phase                          |
| ML5        | "                        | El Cajon       | Mount Laguna          | 32 51 15 | 116 28 32 | granodiorite              |                                                   |
| ML30       | "                        | "              | "                     | 32 44 36 | 116 27 08 | tonalite/granodiorite     | Kitchen Creek pluton                              |
| TS55       | "                        | Borrego Valley | Santa Ysabel          | 33 00 10 | 116 42 29 | tonalite                  |                                                   |
| TS56       | "                        | El Cajon       | Tule Springs          | 32 57 22 | 116 38 50 | tonalite                  |                                                   |
| 1079H      | "                        | "              | Viejas Mountain       | 32 46 41 | 116 38 31 | tonalite                  |                                                   |
| SY911      | "                        | Borrego Valley | Santa Ysabel          | 33 04 26 | 116 43 06 | granodiorite              | hornblende-bearing phase                          |
| D101       | "                        | El Cajon       | Descanso              | 32 50 05 | 116 32 41 | tonalite                  | hornblende and biotite; mafic enclaves            |
| D103A      | "                        | "              | "                     | 32 49 10 | 116 32 34 | tonalite                  | "                                                 |
| CP178      | "                        | Borrego Valley | Julian                | 33 00 02 | 116 33 58 | tonalite                  | Cuyamaca Reservoir pluton                         |

|                                                                                                                                                                                                   |                                  |                |                      |          |           |                       |                                         |
|---------------------------------------------------------------------------------------------------------------------------------------------------------------------------------------------------|----------------------------------|----------------|----------------------|----------|-----------|-----------------------|-----------------------------------------|
| J38                                                                                                                                                                                               | "                                | "              | "                    | 33 05 26 | 116 34 48 | granodiorite          |                                         |
| CP177                                                                                                                                                                                             | Orthoamphib. <sup>5</sup>        | El Cajon       | Cuyamaca Peak        | 32 52 58 | 116 31 20 | amphibolite           | layer in Julian Schist (JTrm)           |
| CP170B                                                                                                                                                                                            | Orthoamphib.                     | "              | "                    | 32 59 02 | 116 30 28 | "                     | "                                       |
| J915                                                                                                                                                                                              | Orthoamphib.                     | Borrego Valley | Julian               | 33 07 02 | 116 35 03 | "                     | layer in Harper Creek Gneiss (Jhc)      |
| 1079C1                                                                                                                                                                                            | Western metavolcanic rocks (Kmv) | El Cajon       | Alpine               | 32 49 35 | 116 51 44 | amphibolite           | screen in Kjv                           |
| TS45                                                                                                                                                                                              | "                                | "              | Tule Springs         | 32 55 02 | 116 39 02 | "                     | screen in Ka                            |
| 1079B                                                                                                                                                                                             | "                                | "              | Alpine               | 32 51 17 | 116 51 04 | meta-dacite tuff      | Lake Jennings screen                    |
| 1079A1                                                                                                                                                                                            | "                                | "              | El Cajon             | 32 52 10 | 116 53 05 | pelitic schist        | minor interbed in metavolcanic sequence |
| WS912                                                                                                                                                                                             | Harper Creek (Jhc)               | Borrego Valley | Hot Springs Mountain | 33 22 29 | 116 37 08 | quartz-rich granitoid |                                         |
| J40                                                                                                                                                                                               | "                                | "              | Julian               | 33 05 33 | 116 35 41 | granodiorite          |                                         |
| MP6                                                                                                                                                                                               | "                                | El Cajon       | Monument Peak        | 32 58 20 | 116 28 30 | quartz-rich granitoid |                                         |
| CP113                                                                                                                                                                                             | "                                | "              | Descanso             | 32 51 47 | 116 30 11 | granodiorite/tonalite | mylonitic                               |
| CP65                                                                                                                                                                                              | "                                | "              | Cuyamaca Peak        | 32 56 34 | 116 32 19 | granodiorite          |                                         |
| CP66                                                                                                                                                                                              | "                                | "              | "                    | 32 56 33 | 116 32 15 | "                     |                                         |
| J902                                                                                                                                                                                              | "                                | Borrego Valley | Julian               | 33 01 43 | 116 32 57 | tonalite/granodiorite |                                         |
| J914                                                                                                                                                                                              | "                                | "              | "                    | 33 07 02 | 116 35 03 | tonalite              |                                         |
| Jhc15                                                                                                                                                                                             | "                                | El Cajon       | Mount Laguna         | 32 52 06 | 116 25 14 | metaquartzite         | in Jhc; cordierite                      |
| 1079E                                                                                                                                                                                             | "                                | "              | Descanso             | 32 48 52 | 116 31 26 | tonalite              |                                         |
| 1079F                                                                                                                                                                                             | "                                | "              | "                    | 32 52 12 | 116 30 40 | quartz-rich granitoid |                                         |
| CP106                                                                                                                                                                                             | "                                | "              | Descanso             | 32 52 22 | 116 30 32 | monzogranite          |                                         |
| MP35                                                                                                                                                                                              | "                                | "              | Monument Peak        | 32 56 19 | 116 29 03 | granodiorite          |                                         |
| PO1                                                                                                                                                                                               | "                                | Borrego Valley | Palomar Observatory  | 33 21 49 | 116 50 08 | "                     |                                         |
| 1079G                                                                                                                                                                                             | "                                | El Cajon       | Viejas Mountain      | 32 46 46 | 116 38 29 | tonalite/granodiorite |                                         |
| 84SC2                                                                                                                                                                                             | Stephenson Peak facies (Jsp)     | Borrego Valley | Earthquake Valley    | 33 06 40 | 116 26 46 | tonalite              |                                         |
| EV911                                                                                                                                                                                             | "                                | "              | "                    | 33 07 02 | 116 26 25 | tonalite/granodiorite |                                         |
| 84SC1                                                                                                                                                                                             | "                                | "              | "                    | 33 06 40 | 116 26 46 | granodiorite          | cordierite, garnet                      |
| 1079M                                                                                                                                                                                             | "                                | "              | Julian               | 33 04 14 | 116 32 36 | "                     |                                         |
| 1079J                                                                                                                                                                                             | Julian Schist (JTrm)             | Borrego Valley | Julian               | 33 03 47 | 116 34 06 | pelitic schist        |                                         |
| 1079L1                                                                                                                                                                                            | "                                | "              | "                    | 33 00 13 | 116 37 17 | "                     |                                         |
| 1079K                                                                                                                                                                                             | "                                | "              | "                    | 33 03 47 | 116 34 06 | metaquartzite         |                                         |
| <sup>1</sup> Px-pyroxene; opx-orthopyroxene; bt-biotite; hbl-hornblende                                                                                                                           |                                  |                |                      |          |           |                       |                                         |
| <sup>2</sup> Suite/unit and map symbol from Todd (2004)                                                                                                                                           |                                  |                |                      |          |           |                       |                                         |
| <sup>3</sup> Samples with 86CA prefix analyzed by J.M. Hammarstrom, U.S. Geological Survey, Reston, VA; remaining samples analyzed by S.E. Shaw, Macquarie University, New South Wales, Australia |                                  |                |                      |          |           |                       |                                         |
| <sup>4</sup> Khsm = Hot Springs Mountain pluton                                                                                                                                                   |                                  |                |                      |          |           |                       |                                         |
| <sup>5</sup> Orthoamphib. = orthoamphibolite layer/lens in JTrm; as restite in Jhc, Jsp                                                                                                           |                                  |                |                      |          |           |                       |                                         |
